# Supplementary material for: Genome-Wide Identification and Characterization of Toll-like Receptors (TLRs) in Diaphorina citri and Their Expression Patterns Induced by the Endophyte Beauveria bassiana
Source: MDPI journal article supplement (doi:10.3390/jof8080888), 2022-08-22
Supplement: s1 [file s1]

**Table S1.** Different species TLRs sequences

| <i>Homo sapiens</i> |           | <i>Mus musculus</i> |           | <i>Bombyx mori</i> |                | <i>Musca domestica</i> |           | <i>Acyrtosiphon pisum</i> |                | <i>Drosophila melanogaster</i> |          | <i>Apis mellifera</i> |                |
|---------------------|-----------|---------------------|-----------|--------------------|----------------|------------------------|-----------|---------------------------|----------------|--------------------------------|----------|-----------------------|----------------|
| Gene name           | Gene ID   | Gene name           | Gene ID   | Gene name          | Gene ID        | Gene name              | Gene ID   | Gene name                 | Gene ID        | Gene name                      | Gene ID  | Gene name             | Gene ID        |
| <i>HsTLR1</i>       | NP_003254 | <i>MmTLR1</i>       | NP_109607 | <i>BmTLR3</i>      | XP_012549875_1 | <i>MdTLR1</i>          | .01900185 | <i>ApTOLL8</i>            | XP_001948566_1 | <i>DmTOLL1</i>                 | AAA28941 | <i>AmTOLL</i>         | XP_006562783_1 |
| <i>HsTLR2</i>       | NP_003255 | <i>MmTLR2</i>       | NP_036035 | <i>BmTOLL6</i>     | XP_012553339_1 | <i>MdTLR2</i>          | .01891253 | <i>ApTOLL</i>             | XP_016656770_1 | <i>DmTOLL2</i>                 | AAF57509 | <i>AmTOLL</i>         | XP_016767399_1 |
| <i>HsTLR3</i>       | NP_003256 | <i>MmTLR3</i>       | NP_569054 | <i>BmTOLL8</i>     | XP_004921742_1 | <i>MdTLR3</i>          | .01892306 | <i>ApTOLL</i>             | XP_001942733_2 | <i>DmTOLL3</i>                 | AAF86229 | <i>AmTOLL</i>         | XP_016767400_1 |
| <i>HsTLR4</i>       | NP_612564 | <i>MmTLR4</i>       | NP_067272 | <i>BmTOLL</i>      | XP_012546804_1 | <i>MdTLR4</i>          | .01889465 | <i>ApTOLL</i>             | XP_008182102_1 | <i>DmTOLL4</i>                 | AAF52747 | <i>AmTOLL</i>         | XP_016767401_1 |
| <i>HsTLR5</i>       | NP_003259 | <i>MmTLR5</i>       | Q9JLF7    | <i>BmTOLL2</i>     | XP_004927316_1 | <i>MdTLR5</i>          | .01890408 | <i>ApTOLL6</i>            | XP_001947324_1 | <i>DmTOLL5</i>                 | AAF86227 | <i>AmTOLL</i>         | XP_016767402_1 |
| <i>HsTLR6</i>       | NP_006059 | <i>MmTLR6</i>       | Q9EPW9    | <i>BmTOLL3</i>     | XP_021204430_1 | <i>MdTLR6</i>          | .01891471 | <i>ApTOLL7</i>            | XP_001946943_2 | <i>DmTOLL6</i>                 | AAF86226 | <i>AmTOLL</i>         | XP_016767403_1 |
| <i>HsTLR7</i>       | NP_057646 | <i>MmTLR7</i>       | NP_573474 | <i>BmTOLL7</i>     | XP_004921732_1 |                        |           | <i>ApTOLL6</i>            | XP_003248960_1 | <i>DmTOLL7</i>                 | AAF57514 | <i>AmTOLL</i>         | XP_026295852_1 |
| <i>HsTLR8</i>       | NP_619542 | <i>MmTLR8</i>       | NP_573475 | <i>BmTLR4</i>      | XP_012546905_1 |                        |           |                           |                | <i>DmTOLL8</i>                 | AAF86224 | <i>AmTOLL</i>         | XP_026295853_1 |
| <i>HsTLR9</i>       | NP_059138 | <i>MmTLR9</i>       | NP_112455 | <i>BmTOLL7</i>     | NP_001116821_1 |                        |           |                           |                | <i>DmTOLL9</i>                 | AAF51581 | <i>AmTOLL8</i>        | XP_393713_3    |
| <i>HsTLR10</i>      | AF296673  | <i>MmTLR11</i>      | NP_991388 | <i>BmTOLL7.2</i>   | XP_004921727_1 |                        |           |                           |                |                                |          | <i>AmTOLL6</i>        | XP_393712_2    |
|                     |           | <i>MmTLR12</i>      | NP_991392 | <i>BmTOLL6.2</i>   | XP_004921738_2 |                        |           |                           |                |                                |          | <i>AmTOLL7</i>        | NP_001013379_1 |
|                     |           | <i>MmTLR13</i>      | NP_991389 | <i>BmTOLL6.3</i>   | XP_004921739_1 |                        |           |                           |                |                                |          | <i>AmTOLL8</i>        | XP_016769909_1 |

**Table S2.** Primer sequences.

| Prime mane    | Sequence                                                              |
|---------------|-----------------------------------------------------------------------|
| <i>ACT1</i>   | F: 5' - TGTGACGAAGAAGTTGCTGC -3'<br>R: 5' - TGGGGTATTTTCAGGGTCAGG -3' |
| <i>DcTLR7</i> | F: 5' - TGAAGGACGGACTGGACATA -3'<br>R: 5' - ATACACCACATAGCCGTCG -3'   |
| <i>DcTOLL</i> | F: 5' - CCCGTGTTATCATCCTGG -3'<br>R: 5' - GGTTCCTTGCCTGGAGATA-3'      |

**Table S3.** First chain cDNA synthesis volume.

| Reactive                      | Volume           |
|-------------------------------|------------------|
| 5× Fastking-RT SuperMix       | 4 µl             |
| Total RNA                     | 50 ng – 2 µg     |
| RNase-Free ddH <sub>2</sub> O | Make up to 20 µl |
| Reaction temperature          | Reaction time    |
| 42°C                          | 15 min           |
| 95°C                          | 3min             |

**Table S4.** Real-time qPCR reaction volume.

| Reactive                      | Volume        |
|-------------------------------|---------------|
| 2× SuperReal PreMix Plus      | 10 µl         |
| Forward primer                | 0.6 µl        |
| Reverse primer                | 0.6 µl        |
| cDNA                          | 2.0 µl        |
| RNase-Free ddH <sub>2</sub> O | 6.8 µl        |
| Reaction temperature          | Reaction time |
| 95°C                          | 15 min        |
| 95°C                          | 10 sec        |
| 58°C                          | 32 sec        |
| Cycles                        | 40 cycles     |
